# Supplementary material for: 2015 American Neuropsychiatric Association Annual Meeting Abstracts
Source: Atypon-hosted journal article supplement (doi:10.1176/appi.neuropsych.272abstracts), 2015-04-01
Supplement: appi.neuropsych.272abstracts.ds001.pdf [file appi.neuropsych.272abstracts.ds001.pdf]

## ABSTRACTS

Full texts of the abstracts presented at the Meeting accompanies the online edition of the spring 2015 issue, at <http://neuro.psychiatryonline.org>. The abstracts can be cited in the same format:

Author name(s): Title of abstract, in Abstracts Presented at the 26<sup>th</sup> Annual Meeting of the American Neuropsychiatric Association. *J Neuropsychiatry Clin Neurosci* 2015; 27(2):e180-e204

- P1. Clinical Utility of the “List Sign” as a Predictor of Non-Demyelinating Disorders in a Multiple Sclerosis (MS) Practice.** *Deepti Anbarasan, Paul Campion, Jonathan Howard*
- P2. Anton’s Syndrome: An Unusual Presentation of an Acute Exacerbation of Multiple Sclerosis (MS).** *Deepti Anbarasan, Jonathan Howard*
- P3. Distractible Tremor in an Alcoholic Patient-Organic or Psychogenic Tremor?** *Vineka Heeramun, Ahmad Elkouzi, Aghaegbulam Uga, Sheila Thomas*
- P4. Phentermine Psychosis: An Under-Recognized Serious Side Effect of Weight Loss Pills.** *Vineka Heeramun, Ahmad El Kouzi, Elias G Karroum*
- P5. Is Tetrabenazine Really Safe in Patients With Concomitant Huntington Disease and Depression Treated With an Antidepressant?** *Vineka Heeramun, Emmanuel Akano, Ahmad Elkouzi, Carmen Orellana*
- P6. New Onset Psychosis: Should You Consider Lyme?** *Swapnil Khurana, Asif Khan, Samuel Wedes*
- P7. ERP-Guided Pharmacological Treatment in a Clinical Sample of Pathologically Aggressive Juveniles: A Retrospective Chart Review Study.** *Daniel T. Matthews, Glenda Whitaker Matthews, Larry Fisher*
- P8. The Neppe Diagnostic Screen-10 (DS-10) in Neuropsychiatry, Psychiatry and Behavioral Neurology: A New Clinically And Research Relevant Batch of Ten Outpatient, Waiting-Room Patient Diagnostic Questionnaires of Proven Value that Assess Progression and Change.** *Vernon M Neppe*
- P9. Taming the Temporal and Frontal Lobes of the Brain by Applying Higher Brain Function Structured Inventories—“The Inventory Of Neppe Of Symptoms Of Epilepsy And The Temporal Lobe” (INSET) and the “Subtle Organic Brain Inventory Of Neppe” (SOBIN) Together With Ambulatory Electroencephalography Parameters, and Clinical Anticonvulsant Responsiveness.** *Vernon M Neppe*
- P10. Diagnostic and Follow-Up Clinical Utility of the BROCAS SCAN – The Screening Cerebral Assessment Of Neppe and Auditory And Visual Integration Test (IVA) in Neuropsychiatry, Psychiatry and Behavioral Neurology Outpatient Clinical and Forensic Use.** *Vernon M Neppe*
- P11. A Naturalistic Study on Care Delivery for Geriatric Patients With Neuropsychiatric Illness.** *Annya Tisher, John J Campbell III*
- P12. Comparison and Clinical Implications of the Normative Distributions of the Mini-Mental State Examination and Montreal Cognitive Assessment.** *David B. Arciniegas, Ashley Devereaux, Joshua J. Rodgers, Daniel I. Kaufer, C. Alan Anderson*
- P13. Performance Validity Testing: A Critical Update.** *Robert D. Shura, John H. Denning*
- P14. Working Memory: Bridging Cognitive Theory and Clinical Neuroscience.** *Robert D. Shura, Robin A. Hurley, Katherine H. Taber*
- P15. A Complex Case of a Veteran Post Frontal Meningioma Resection: Neurological and Neuropsychological Interpretations.** *Robert D. Shura, Ruth E. Yoash-Gantz, Katherine H. Taber, Andrew R. Stefanick*
- P16. The Utility of Timed Handwriting Sample in Neurological and Psychiatric Disorders.** *Drake D Duane, Minami Tokuyama*
- P17. Therapeutic Risk Management of the Neuropsychiatric Patient.** *Hal S. Wortzel, Bridget Matarazzo, Beeta Homaifar*
- P18. Abuse Realized - Examples of Neuroimaging Abuses in Brain Injury Litigation.** *Hal S. Wortzel, A. John Tsiouris, Christopher G. Filippi*
- P19. Epidural Cortical Stimulation of the Left DLPFC Leads to Dose-Dependent Enhancement of Working Memory in Patients With MDD.** *J.A. Camprodon, N. Kaur, T. Deckersbach, K.C. Evans, B.H. Kopell, J. Halverson, D. Kondziolka, R. Howland, E. Eskandar, D.D. Dougherty*
- P20. Functional Neuroimaging of Psychotherapy for Major Depression.** *Donald Eknoyan, Robin A. Hurley, Katherine H. Taber*
- P21. The Neuroanatomy of Implicit and Explicit Bias; Implications for Clinicians.** *Kristina M. Reihl, Robin A. Hurley, Katherine H. Taber*
- P22. Classifying Patients into Likely Trajectories of Decline by Positive and Negative  $\beta$ -Amyloid Status.** *Paula Trzepacz, Helen Hochstetler, Shufang Wang, Peng Yu, Michael Case, Jeannie-Marie Sheppard Leoutsakos, David Henley, Elisabeth K Degenhardt, Constantine Lyketsos*
- P23. Frontotemporal Dementia with Parkinsonism in a Young Woman Presenting with Progressive Agitation and Mood Dysregulation.** *Tracy Binius, Amber May, Joseph J. Cooper*
- P24. Refractory Obsessive-Compulsive Syndrome Following Thalamic Infarct.** *Rich Clarey, Joseph J. Cooper*
- P25. Transcortical Sensory Aphasia and Hypofrontal Presentation of Gerstmann-Sträussler-Scheinker Disease.** *Corcoran AR, Burns KE, Mathenia N, Gausche ED*
- P26. C9orf72 FTD With Anti-Recoverin Antibody Presenting as Catatonia Responsive to IVIG: a Case Report.** *Corcoran AR, Stan VA, Troyer EA, Gausche ED, Schrift MJ.*

- P27. "Crisscrossed" Clinicopathologic Profiles in Two Cases of FTLD-tauopathies: A Focus on Primary Progressive Aphasia and Corticobasal Syndrome.** *Tamar Gefen, Janet Cohen Sherman, E. Tessa Hedley-Whyte, Matthew Frosch, Bradford C. Dickerson*
- P28. Neuropsychiatric features of Down Syndrome With Alzheimer's-type Dementia: A Comparison of Patients With and Without Seizures.** *Sara Berman Mitchell, Rani Sarkis, Taha Gholipour, Zeina N Chemali*
- P29. Clinical and Imaging Predictors of Neuropsychiatric Symptomatology in Primary Progressive Aphasia.** *Sara B Mitchell, Frances B. Hatling, Christina Caso, Chenjie Xia, Megan Quimby, Kathleen Kelly, Kimiko Domoto-Reilly, Scott McGinnis, Daisy Hochberg, Bradford C Dickerson*
- P30. The Social Impairment Rating Scale (SIRS) Relates to Atrophy in Distinct Corticolimbic Networks in Schizophrenia and Frontotemporal Dementia (FTD).** *Chenjie Xia, Michael Stepanovic, Christina Caso, Stephanie DeCross, Simon Ducharme, Sara Makaretz, Jaya Padmanabhan, Daphne Holt, Bradford Dickerson*
- P31. Identical Twins With Discordant Neuropsychiatric Illnesses.** *Lawrence Adler*
- P32. 5HT2A and Mental Disorders: Multi-Center Study to Determine Association of Genetic Polymorphisms and Mental Disorders.** *Bilikis Akindele, Tobore Onojighofia, Brian Meshkin, Dan Schwarz, Derrick Holman, Mary Knauer, John Hubbard*
- P33. A Multi-site Voxel-based Morphometry Study of Tourette Syndrome.** *Alton C. Williams III, Deanna J. Greene, Matthew T. Perry, Jonathan Michael Koller, Bradley Schlaggar, Kevin J. Black*
- P34. Tourette Syndrome and Socioeconomic Status.** *Mark Aldred, Andrea E. Cavanna*
- P35. Urinary Incontinence in Catatonia: Sign or Sequela?** *M. Justin Coffey, Louis Joseph, Nikhil Dhawan*
- P36. Tourette Syndrome is Characterized by Atypical Activation within the Mentalizing Network.** *Eddy CM, Hansen PC, Rickards HE, Cavanna AE*
- P37. Severe Malignant Catatonia With Response to Daily Electroconvulsive Therapy in a Patient With Neuropsychiatric Lupus.** *Jones M.B., Gausche ED, Reed EJ.*
- P38. Cotard's Syndrome, Delusional Misidentification, and Depersonalization in a Patient With Epilepsy.** *Jones M, Gomoll B, Schrift M.*
- P39. Is Response to Zolpidem in Disorders of Consciousness Predicted by the Presence of Catatonic Features?** *Joshua J. Rodgers, David B. Arciniegas*
- P40. Catatonia in the General Hospital; Underlying Causes and Disparity in Workup.** *Joan Roig Llesuy, Paige Marnell, Anna Piotrowski, Joseph J Cooper*
- P41. Visual Hallucinations following Occipital Stroke: A Case Report on Charles Bonnet Syndrome.** *Leyla Baran Akce, Sumi T Cyriac, Anil Jain*
- P42. Acute Disseminated Encephalomyelitis Secondary to Flumist Vaccine With Persistent Cognitive Deficits.** *Marc Bouchard, David Williamson*
- P43. Mixing It Up: Combined Affective and Cognitive Presentation of Cerebellar Cognitive Affective Syndrome.** *Jessica Short, Katherine B. Brownlowe*
- P44. Wernicke-Korsakoff Syndrome in a Non-Alcoholic Patient.** *Maryam Jahdi, Katherine Brownlowe*
- P45. PSP Presenting With Vestibular Symptoms: A Frustrating "Forme Fruste".** *Peter Robinson, Katherine B. Brownlowe, John G. Oas*
- P46. Multifactorial Delirium and Neuropsychiatric Sequelae After Pituitary Adenoma Resection Complicated by S. Pneumoniae Meningitis.** *Serena Chang, Hortensia Valeron, Vanessa Padilla*
- P47. Persistent Neuropsychosis From Untreated Headache in Susac Syndrome.** *Megan L. Davis, Kristen K. Steenerson, Dan J. Capampangan*
- P48. Ticked Off by a Twist of Lyme – Delusional Disorder in the Aftermath of Lyme Disease – A Case Report.** *Arpita Goswami Banerjee, Ajita Mathur, Carolina Retamero*
- P49. Enduring Manic Spectrum Behavior After Right Basal Ganglia and Frontal Lobe Stroke.** *Colin J. Harrington, Benjamin Margolis, Laura Anderson*
- P50. Teaching Materials to Assist in the Neuropsychiatric Investigation and Understanding of Solvent-Induced Encephalopathy.** *Robin A. Hurley, Katherine H. Taber*
- P51. Adults With ADHD: A Review of Recent Findings.** *Alex Jadidian, Robin A. Hurley, Katherine H. Taber*
- P52. Treatment of Emotional Deficits With Escitalopram in a Patient With Cerebellar Strokes and Neurosarcoidosis: A Case Report and Literature Review.** *Presenting Author: Walter Kilpatrick, Co-Authors: Laura Safar, Gaston Baslet*
- P53. Hypocalcemia, Basal Ganglia Calcification, and Crime: A Case of a Frontal-Striatal Circuit Abnormality Exacerbated by Hypocalcemia.** *Amber May, Michael Schrift, Tracy Binius, Lauren Fiske, Jehu Strange, Aneet Ahluwalia*
- P54. A Case of Leigh Syndrome From Pyruvate Dehydrogenase Deficiency: Unexplored Territory With Survival Into Adulthood.** *Kathy L Niu*
- P55. Revisiting Myxedema Madness: A Case Report and Review of the Literature.** *Aaron Ritter*
- P56. Emotion Regulation in Functional Neurological Symptom Disorder Patients Receiving Group Dialectical Behavior Therapy Skills Training.** *Diana Wertz, Ariela Karasov, Kim Bullock, Mickey Trockel*
- P57. Brain Function During Assessment of Emotions and Intentions in Self and in Others: Multiple Differences Between Schizophrenia and Control Subjects.** *Javier Quintana, Omer Liran*

- P58. Electroconvulsive Therapy for Behavioral and Psychological Symptoms of Dementia.** *Ilan Fischler, Bandar AlAqeel, Robyn Waxman, Omar Ghaffar*
- P59. Can Cognitive Measures Predict Clinical Response to the Treatment of Major Depression With Repetitive Transcranial Magnetic Stimulation?** *Mandana Modirrousta, Benjamin Meek, Parsa Mansouri*
- P60. An Array of Serum Biomarkers May Predict Response to Transcranial Magnetic Stimulation in Major Depression Patients.** *Sandeep Vaishnavi, John A. Bilello*
- P61. Long Term Functional Electrophysiological Recordings of the Human Sub-Thalamic Nucleus in Obsessive Compulsive Disorder (OCD).** *Odeya Marmor, Atira Bick, Dan Valsky, David Arkadir, Eddie Linetsky, Anna Castrioto, Zvi Israel, Hagai Bergman, Renana Eitan*
- P62. Lateralization of Emotional and Cognitive Functions of the Human Sub-Thalamic Nucleus.** *Odeya Marmor, Atira Bick, Dan Valsky, David Arkadir, Eddie Linetsky, Rubi Shamir, Zvi Israel, Hagai Bergman, Renana Eitan*
- P63. Do Cognitive or Behavioral Impairments Predict Caregiver Concerns About Driving Safety in Cognitively Impaired Older Adults?** *Janessa O. Carvalho, Beth A. Springate, Andrea Couto, Jennifer D. Davis*
- P64. Community-Based Day Program for Patients With Brain Injury & Associated Neuropsychiatric Symptoms (NPS): A Proposed Model of Care.** *Faizi Ahmed, Kathleen Kortte, Vani Rao*
- P65. A Biopsychosocial Cultural Perspective on Depression After Traumatic Brain Injury.** *Durga Roy, Vani Rao*
- P66. Attendance to First Follow-Up Appointment After Psychogenic Non-Epileptic Seizures (PNES) Diagnosis.** *G. Baslet, N. Qureshi, J. Zinser, M. Gottesman, M. Hill, D. L. Perez, B. Tolchin, B. Dworetzky.*
- P67. The Evolution of the Concussion Clinic at the Neuropsychiatry Program at Sheppard Pratt.** *Margo D Lauterbach, Kristy Lane, Paula Notarangelo, Sarah Loeffler*
- P68. The Cognitive Effects of Enriched Environment on Mice With Traumatic Brain Injury.** *Schreiber, S., Lin, R., Heim, L., Baratz-Goldstien, R., Rubovitch, V., Vaisman, N., Pick, C.G.*
- P69. Correlation of Stroke Location and Post-Stroke Depression.** *Lisa Atack, R. Scott Babe*
- P70. Improvement of Verbal Ability Correlated With Increased Left Temporal Perfusion Following Encephaloduroarteriosynangiosis in Pediatric Patients With Moyamoya Disease.** *Yen-Hsuan Hsu, Ya-Fang Chen, Mau-Sun Hua, Hon-Man Liu, Meng-Fai Kuo, Chi-Cheng Yang*
- P71. Synthetic Cannabis: Neuropsychiatric Complications of Intoxication and Withdrawal.** *Adriana de Julio, Merlyn Abrahams, Jude Registre*
